# Supplementary material
Source: PubMed Central journal article supplement (PMC8760360)
Supplement: NIHMS1721780-supplement-1.pdf [file NIHMS1721780-supplement-1.pdf]

Supplemental Table. Results of tipping point analysis.

| Time 2 Results                    |              | CBTi (n=56; n missing = 20) |              |              |              |              | Control (n=54; n missing = 7) |              |              |              |              |          |               |               |  |
|-----------------------------------|--------------|-----------------------------|--------------|--------------|--------------|--------------|-------------------------------|--------------|--------------|--------------|--------------|----------|---------------|---------------|--|
| offset                            | M            | M*                          | - 95%        | CI -         | SD           | M            | M*                            | - 95%        | CI -         | SD           | t            | df       | p             | ES            |  |
| <b>CAPS</b>                       |              |                             |              |              |              |              |                               |              |              |              |              |          |               |               |  |
| 0                                 | 57.23        | 53.15                       | 49.39        | 56.91        | 20.23        | 59.03        | 63.26                         | 59.58        | 66.95        | 18.95        | -3.61        | 1        | 0.0003        | -0.507        |  |
| 2.0                               | 57.95        | 53.86                       | 50.09        | 57.63        | 20.28        | 59.03        | 63.27                         | 59.57        | 66.96        | 18.95        | -3.35        | 1        | 0.0008        | -0.471        |  |
| 4.0                               | 58.66        | 54.57                       | 50.79        | 58.35        | 20.37        | 59.03        | 63.27                         | 59.56        | 66.98        | 18.95        | -3.08        | 1        | 0.0020        | -0.435        |  |
| 6.0                               | 59.37        | 55.29                       | 51.48        | 59.09        | 20.50        | 59.03        | 63.27                         | 59.54        | 67.00        | 18.95        | -2.81        | 1        | 0.0049        | -0.398        |  |
| 8.0                               | 60.09        | 56.00                       | 52.16        | 59.83        | 20.68        | 59.03        | 63.27                         | 59.51        | 67.04        | 18.95        | -2.54        | 1        | 0.0110        | -0.361        |  |
| 10.0                              | 60.80        | 56.71                       | 52.84        | 60.58        | 20.90        | 59.03        | 63.28                         | 59.47        | 67.08        | 18.95        | -2.27        | 1        | 0.0232        | -0.323        |  |
| 12.0                              | 61.52        | 57.42                       | 53.50        | 61.34        | 21.17        | 59.03        | 63.28                         | 59.42        | 67.14        | 18.95        | -2.00        | 1        | 0.0455        | -0.286        |  |
| <b>12.2</b>                       | <b>61.59</b> | <b>57.49</b>                | <b>53.57</b> | <b>61.42</b> | <b>21.20</b> | <b>59.03</b> | <b>63.28</b>                  | <b>59.41</b> | <b>67.14</b> | <b>18.95</b> | <b>-1.97</b> | <b>1</b> | <b>0.0485</b> | <b>-0.283</b> |  |
| <b>12.4</b>                       | <b>61.66</b> | <b>57.57</b>                | <b>53.63</b> | <b>61.50</b> | <b>21.23</b> | <b>59.03</b> | <b>63.28</b>                  | <b>59.41</b> | <b>67.15</b> | <b>18.95</b> | <b>-1.95</b> | <b>1</b> | <b>0.0516</b> | <b>-0.279</b> |  |
| 13.0                              | 61.87        | 57.78                       | 53.83        | 61.73        | 21.32        | 59.03        | 63.28                         | 59.39        | 67.16        | 18.95        | -1.87        | 1        | 0.0621        | -0.268        |  |
| 14.0                              | 62.23        | 58.14                       | 54.16        | 62.11        | 21.47        | 59.03        | 63.28                         | 59.36        | 67.20        | 18.95        | -1.73        | 1        | 0.0832        | -0.250        |  |
| <b>14.6</b>                       | <b>62.45</b> | <b>58.35</b>                | <b>54.35</b> | <b>62.34</b> | <b>21.57</b> | <b>59.03</b> | <b>63.28</b>                  | <b>59.35</b> | <b>67.22</b> | <b>18.95</b> | <b>-1.65</b> | <b>1</b> | <b>0.0983</b> | <b>-0.239</b> |  |
| <b>14.8</b>                       | <b>62.52</b> | <b>58.42</b>                | <b>54.42</b> | <b>62.42</b> | <b>21.61</b> | <b>59.03</b> | <b>63.28</b>                  | <b>59.34</b> | <b>67.22</b> | <b>18.95</b> | <b>-1.63</b> | <b>1</b> | <b>0.1038</b> | <b>-0.235</b> |  |
| 15.0                              | 62.59        | 58.49                       | 54.48        | 62.50        | 21.64        | 59.03        | 63.28                         | 59.33        | 67.23        | 18.95        | -1.60        | 1        | 0.1095        | -0.231        |  |
| <b>CAPS (without sleep items)</b> |              |                             |              |              |              |              |                               |              |              |              |              |          |               |               |  |
| 0                                 | 51.10        | 47.12                       | 43.51        | 49.59        | 19.32        | 52.25        | 56.38                         | 52.83        | 59.93        | 18.56        | -3.43        | 1        | 0.0006        | -0.481        |  |
| 2.0                               | 51.82        | 47.83                       | 44.22        | 51.44        | 19.35        | 52.25        | 56.39                         | 52.83        | 59.94        | 18.56        | -3.16        | 1        | 0.0016        | -0.444        |  |
| 4.0                               | 52.53        | 48.54                       | 44.92        | 52.17        | 19.44        | 52.25        | 56.39                         | 52.82        | 59.95        | 18.56        | -2.89        | 1        | 0.0038        | -0.406        |  |
| 6.0                               | 53.25        | 49.25                       | 45.61        | 52.90        | 19.57        | 52.25        | 56.39                         | 52.80        | 59.98        | 18.56        | -2.62        | 1        | 0.0089        | -0.368        |  |
| 8.0                               | 53.96        | 49.96                       | 46.29        | 53.64        | 19.75        | 52.25        | 56.39                         | 52.77        | 60.01        | 18.56        | -2.34        | 1        | 0.0195        | -0.330        |  |
| 10.0                              | 54.68        | 50.68                       | 46.96        | 54.39        | 19.97        | 52.25        | 56.40                         | 52.73        | 60.06        | 18.56        | -2.06        | 1        | 0.0398        | -0.292        |  |
| <b>10.6</b>                       | <b>54.89</b> | <b>50.89</b>                | <b>47.16</b> | <b>54.62</b> | <b>20.05</b> | <b>52.25</b> | <b>56.40</b>                  | <b>52.72</b> | <b>60.07</b> | <b>18.56</b> | <b>-1.97</b> | <b>1</b> | <b>0.0486</b> | <b>-0.280</b> |  |
| <b>10.8</b>                       | <b>54.96</b> | <b>50.96</b>                | <b>47.23</b> | <b>54.69</b> | <b>20.08</b> | <b>52.25</b> | <b>56.40</b>                  | <b>52.72</b> | <b>60.08</b> | <b>18.56</b> | <b>-1.94</b> | <b>1</b> | <b>0.0519</b> | <b>-0.276</b> |  |
| 11.0                              | 55.03        | 51.03                       | 47.29        | 54.77        | 20.10        | 52.25        | 56.40                         | 52.71        | 60.08        | 18.56        | -1.92        | 1        | 0.0553        | -0.273        |  |

|              |              |              |              |              |              |              |              |              |              |              |              |          |               |               |
|--------------|--------------|--------------|--------------|--------------|--------------|--------------|--------------|--------------|--------------|--------------|--------------|----------|---------------|---------------|
| 12.0         | 55.39        | 51.39        | 47.63        | 55.15        | 20.24        | 52.25        | 56.40        | 52.69        | 60.11        | 18.56        | -1.78        | 1        | 0.0754        | -0.254        |
| <b>12.8</b>  | <b>55.68</b> | <b>51.67</b> | <b>47.89</b> | <b>55.46</b> | <b>20.36</b> | <b>51.93</b> | <b>56.40</b> | <b>52.67</b> | <b>60.13</b> | <b>18.56</b> | <b>-1.67</b> | <b>1</b> | <b>0.0954</b> | <b>-0.238</b> |
| <b>13.0</b>  | <b>55.75</b> | <b>51.74</b> | <b>47.96</b> | <b>55.53</b> | <b>20.39</b> | <b>51.93</b> | <b>56.40</b> | <b>52.66</b> | <b>60.14</b> | <b>18.56</b> | <b>-1.64</b> | <b>1</b> | <b>0.1010</b> | <b>-0.235</b> |
| 14.0         | 56.10        | 52.10        | 48.28        | 55.92        | 20.55        | 52.25        | 56.40        | 52.63        | 60.17        | 18.56        | -1.50        | 1        | 0.1327        | -0.216        |
| <b>ISI</b>   |              |              |              |              |              |              |              |              |              |              |              |          |               |               |
| 0            | 12.44        | 12.04        | 10.69        | 13.38        | 6.09         | 17.99        | 18.41        | 17.17        | 19.65        | 5.34         | -6.56        | 1        | < .0001       | -1.093        |
| 2.0          | 13.16        | 12.76        | 11.41        | 14.11        | 6.15         | 17.99        | 18.40        | 17.16        | 19.64        | 5.34         | -5.79        | 1        | < .0001       | -0.963        |
| 4.0          | 13.87        | 13.48        | 12.11        | 14.86        | 6.36         | 17.99        | 18.39        | 17.12        | 19.66        | 5.34         | -4.93        | 1        | < .0001       | -0.822        |
| 6.0          | 14.59        | 14.21        | 12.78        | 15.63        | 6.70         | 17.99        | 18.39        | 17.06        | 19.71        | 5.34         | -4.04        | 1        | < .0001       | -0.678        |
| 8.0          | 15.30        | 14.93        | 13.43        | 16.43        | 7.15         | 17.99        | 18.38        | 16.97        | 19.78        | 5.34         | -3.16        | 1        | 0.0016        | -0.536        |
| 10.0         | 16.02        | 15.65        | 14.07        | 17.24        | 7.70         | 17.99        | 18.37        | 16.87        | 19.87        | 5.34         | -2.34        | 1        | 0.0192        | -0.402        |
| <b>11.0</b>  | <b>16.37</b> | <b>16.01</b> | <b>14.38</b> | <b>17.65</b> | <b>8.01</b>  | <b>17.99</b> | <b>18.36</b> | <b>16.81</b> | <b>19.92</b> | <b>5.34</b>  | <b>-1.96</b> | <b>1</b> | <b>0.0499</b> | <b>-0.339</b> |
| <b>11.2</b>  | <b>16.44</b> | <b>16.08</b> | <b>14.44</b> | <b>17.73</b> | <b>8.07</b>  | <b>17.99</b> | <b>18.36</b> | <b>16.79</b> | <b>19.93</b> | <b>5.34</b>  | <b>-1.89</b> | <b>1</b> | <b>0.0592</b> | <b>-0.327</b> |
| <b>11.8</b>  | <b>16.66</b> | <b>16.30</b> | <b>14.62</b> | <b>17.98</b> | <b>8.27</b>  | <b>17.99</b> | <b>18.36</b> | <b>16.76</b> | <b>19.97</b> | <b>5.34</b>  | <b>-1.67</b> | <b>1</b> | <b>0.0948</b> | <b>-0.290</b> |
| <b>12.0</b>  | <b>16.73</b> | <b>16.37</b> | <b>14.68</b> | <b>18.06</b> | <b>8.33</b>  | <b>17.99</b> | <b>18.36</b> | <b>16.74</b> | <b>19.98</b> | <b>5.34</b>  | <b>-1.60</b> | <b>1</b> | <b>0.1095</b> | <b>-0.278</b> |
| <b>HAM-D</b> |              |              |              |              |              |              |              |              |              |              |              |          |               |               |
| 0            | 16.32        | 15.11        | 13.80        | 16.42        | 6.44         | 19.92        | 21.17        | 19.90        | 22.44        | 5.95         | -6.27        | 1        | < .0001       | -0.961        |
| 2.0          | 17.03        | 15.82        | 14.51        | 17.14        | 6.57         | 19.92        | 21.17        | 19.90        | 22.45        | 5.95         | -5.50        | 1        | < .0001       | -0.840        |
| 4.0          | 17.75        | 16.53        | 15.19        | 17.88        | 6.83         | 19.92        | 21.18        | 19.86        | 22.49        | 5.95         | -4.64        | 1        | < .0001       | -0.712        |
| 6.0          | 18.46        | 17.25        | 15.84        | 18.65        | 7.21         | 19.92        | 21.18        | 19.80        | 22.55        | 5.95         | -3.77        | 1        | 0.0002        | -0.584        |
| 8.0          | 19.18        | 17.96        | 16.48        | 19.44        | 7.69         | 19.92        | 21.18        | 19.73        | 22.64        | 5.95         | -2.92        | 1        | 0.0034        | -0.460        |
| 10.0         | 19.89        | 18.67        | 17.09        | 20.25        | 8.26         | 19.92        | 21.18        | 19.63        | 22.74        | 5.95         | -2.14        | 1        | 0.0320        | -0.342        |
| <b>10.4</b>  | <b>20.03</b> | <b>18.81</b> | <b>17.22</b> | <b>20.41</b> | <b>8.38</b>  | <b>19.92</b> | <b>21.18</b> | <b>19.61</b> | <b>22.76</b> | <b>5.95</b>  | <b>-1.99</b> | <b>1</b> | <b>0.0462</b> | <b>-0.320</b> |
| <b>10.6</b>  | <b>20.11</b> | <b>18.88</b> | <b>17.28</b> | <b>20.49</b> | <b>8.45</b>  | <b>19.92</b> | <b>21.18</b> | <b>19.60</b> | <b>22.77</b> | <b>5.95</b>  | <b>-1.92</b> | <b>1</b> | <b>0.0547</b> | <b>-0.309</b> |
| 10.8         | 20.18        | 18.95        | 17.34        | 20.57        | 8.51         | 19.92        | 21.18        | 19.59        | 22.78        | 5.95         | -1.85        | 1        | 0.0644        | -0.298        |
| 11.0         | 20.25        | 19.03        | 17.40        | 20.65        | 8.57         | 19.92        | 21.18        | 19.57        | 22.79        | 5.95         | -1.78        | 1        | 0.0754        | -0.287        |
| <b>11.2</b>  | <b>20.32</b> | <b>19.10</b> | <b>17.46</b> | <b>20.74</b> | <b>8.64</b>  | <b>19.92</b> | <b>21.18</b> | <b>19.56</b> | <b>22.81</b> | <b>5.95</b>  | <b>-1.71</b> | <b>1</b> | <b>0.0876</b> | <b>-0.276</b> |
| <b>11.4</b>  | <b>20.32</b> | <b>19.17</b> | <b>17.52</b> | <b>20.82</b> | <b>8.70</b>  | <b>19.92</b> | <b>21.18</b> | <b>19.55</b> | <b>22.82</b> | <b>5.95</b>  | <b>-1.64</b> | <b>1</b> | <b>0.1013</b> | <b>-0.265</b> |
| 11.6         | 20.46        | 19.24        | 17.58        | 20.90        | 8.77         | 19.92        | 21.19        | 19.54        | 22.83        | 5.95         | -1.57        | 1        | 0.1164        | -0.255        |
| 11.8         | 20.53        | 19.31        | 17.64        | 20.98        | 8.83         | 19.92        | 21.19        | 19.53        | 22.84        | 5.95         | -1.50        | 1        | 0.1330        | -0.244        |

|                                                                                           |              |              |              |              |              |              |              |              |              |              |              |           |               |               |
|-------------------------------------------------------------------------------------------|--------------|--------------|--------------|--------------|--------------|--------------|--------------|--------------|--------------|--------------|--------------|-----------|---------------|---------------|
| 12.0                                                                                      | 20.61        | 19.38        | 17.70        | 21.07        | 8.90         | 19.92        | 21.19        | 19.52        | 22.85        | 5.95         | -1.44        | 1         | 0.1511        | -0.234        |
| <b>HAM-D (without sleep items)</b>                                                        |              |              |              |              |              |              |              |              |              |              |              |           |               |               |
| 0                                                                                         | 13.00        | 11.93        | 10.76        | 13.10        | 5.29         | 15.18        | 16.30        | 15.15        | 17.45        | 5.56         | -5.02        | 1         | < .0001       | -0.792        |
| 2.0                                                                                       | 13.72        | 12.64        | 11.46        | 13.83        | 5.44         | 15.18        | 16.30        | 15.14        | 17.46        | 5.56         | -4.17        | 1         | < .0001       | -0.655        |
| 4.0                                                                                       | 14.43        | 13.35        | 12.13        | 14.57        | 5.74         | 15.18        | 16.30        | 15.10        | 17.51        | 5.56         | -3.26        | 1         | 0.0011        | -0.514        |
| 6.0                                                                                       | 15.15        | 14.07        | 12.78        | 15.35        | 6.18         | 15.18        | 16.31        | 15.04        | 17.57        | 5.56         | -2.35        | 1         | 0.0188        | -0.375        |
| <b>6.8</b>                                                                                | <b>15.43</b> | <b>14.35</b> | <b>13.04</b> | <b>15.66</b> | <b>6.39</b>  | <b>15.18</b> | <b>16.31</b> | <b>15.01</b> | <b>17.61</b> | <b>5.56</b>  | <b>-2.00</b> | <b>1</b>  | <b>0.0452</b> | <b>-0.321</b> |
| <b>7.0</b>                                                                                | <b>15.50</b> | <b>14.42</b> | <b>13.10</b> | <b>15.74</b> | <b>6.44</b>  | <b>15.18</b> | <b>16.31</b> | <b>15.00</b> | <b>17.62</b> | <b>5.56</b>  | <b>-1.92</b> | <b>1</b>  | <b>0.0551</b> | <b>-0.308</b> |
| <b>7.6</b>                                                                                | <b>15.72</b> | <b>14.63</b> | <b>13.29</b> | <b>15.98</b> | <b>6.61</b>  | <b>15.18</b> | <b>16.31</b> | <b>14.97</b> | <b>17.64</b> | <b>5.56</b>  | <b>-1.67</b> | <b>1</b>  | <b>0.0954</b> | <b>-0.269</b> |
| <b>7.8</b>                                                                                | <b>15.79</b> | <b>14.71</b> | <b>13.35</b> | <b>16.06</b> | <b>6.67</b>  | <b>15.18</b> | <b>16.31</b> | <b>14.96</b> | <b>17.65</b> | <b>5.56</b>  | <b>-1.59</b> | <b>1</b>  | <b>0.1127</b> | <b>-0.256</b> |
| 8.0                                                                                       | 15.86        | 14.78        | 13.41        | 16.14        | 6.73         | 15.18        | 16.31        | 14.95        | 17.66        | 5.56         | -1.51        | 1         | 0.1322        | -0.244        |
| <b>Time 2 Results CBTi+CPT (n=56; n missing = 31) Control +CPT (n=54; n missing = 18)</b> |              |              |              |              |              |              |              |              |              |              |              |           |               |               |
|                                                                                           | <b>M</b>     | <b>M*</b>    | <b>- 95%</b> | <b>CI -</b>  | <b>SD</b>    | <b>M</b>     | <b>M*</b>    | <b>- 95%</b> | <b>CI -</b>  | <b>SD</b>    | <b>F</b>     | <b>df</b> | <b>p</b>      | <b>ES</b>     |
| <b>CAPS</b>                                                                               |              |              |              |              |              |              |              |              |              |              |              |           |               |               |
| 0                                                                                         | 39.03        | 36.82        | 31.40        | 42.23        | 21.07        | 45.11        | 47.41        | 42.35        | 52.47        | 21.64        | -2.67        | 1         | 0.0077        | -0.488        |
| 2.0                                                                                       | 40.14        | 37.93        | 32.53        | 43.33        | 20.81        | 45.11        | 47.41        | 42.36        | 52.45        | 21.64        | -2.39        | 1         | 0.0169        | -0.439        |
| 4.0                                                                                       | 41.25        | 39.04        | 33.65        | 44.44        | 20.59        | 45.11        | 47.40        | 42.36        | 52.44        | 21.64        | -2.11        | 1         | 0.0349        | -0.389        |
| <b>5.0</b>                                                                                | <b>41.80</b> | <b>39.60</b> | <b>34.20</b> | <b>45.00</b> | <b>20.50</b> | <b>45.11</b> | <b>47.39</b> | <b>42.36</b> | <b>52.43</b> | <b>21.64</b> | <b>-1.97</b> | <b>1</b>  | <b>0.0490</b> | <b>-0.364</b> |
| <b>5.2</b>                                                                                | <b>41.91</b> | <b>39.71</b> | <b>34.31</b> | <b>45.11</b> | <b>20.48</b> | <b>45.11</b> | <b>47.39</b> | <b>42.35</b> | <b>52.43</b> | <b>21.64</b> | <b>-1.94</b> | <b>1</b>  | <b>0.0524</b> | <b>-0.359</b> |
| 6.0                                                                                       | 42.36        | 40.16        | 34.76        | 45.56        | 20.42        | 45.11        | 47.39        | 42.35        | 52.43        | 21.64        | -1.83        | 1         | 0.0678        | -0.338        |
| 7.0                                                                                       | 42.91        | 40.71        | 35.31        | 46.11        | 20.36        | 45.11        | 47.39        | 42.34        | 52.43        | 21.64        | -1.68        | 1         | 0.0922        | -0.313        |
| <b>7.2</b>                                                                                | <b>43.02</b> | <b>40.83</b> | <b>35.42</b> | <b>46.23</b> | <b>20.34</b> | <b>45.11</b> | <b>47.39</b> | <b>42.34</b> | <b>52.43</b> | <b>21.64</b> | <b>-1.66</b> | <b>1</b>  | <b>0.0978</b> | <b>-0.308</b> |
| <b>7.4</b>                                                                                | <b>43.13</b> | <b>40.94</b> | <b>35.54</b> | <b>46.34</b> | <b>20.33</b> | <b>45.11</b> | <b>47.39</b> | <b>42.34</b> | <b>52.43</b> | <b>21.64</b> | <b>-1.63</b> | <b>1</b>  | <b>0.1037</b> | <b>-0.302</b> |
| 8.0                                                                                       | 43.46        | 41.27        | 35.87        | 46.68        | 20.30        | 45.11        | 47.38        | 42.34        | 52.43        | 21.64        | -1.54        | 1         | 0.1232        | -0.287        |
| <b>CAPS (without sleep items)</b>                                                         |              |              |              |              |              |              |              |              |              |              |              |           |               |               |
| 0                                                                                         | 34.27        | 31.99        | 27.04        | 36.95        | 19.88        | 39.14        | 41.50        | 36.62        | 46.38        | 20.51        | -2.57        | 1         | 0.0103        | -0.463        |
| 2.0                                                                                       | 35.38        | 33.11        | 28.16        | 38.05        | 19.62        | 39.14        | 41.49        | 36.63        | 46.36        | 20.51        | -2.27        | 1         | 0.0233        | -0.411        |
| <b>4.0</b>                                                                                | <b>36.49</b> | <b>34.22</b> | <b>29.28</b> | <b>39.16</b> | <b>19.41</b> | <b>39.14</b> | <b>41.49</b> | <b>36.63</b> | <b>46.35</b> | <b>20.51</b> | <b>-1.97</b> | <b>1</b>  | <b>0.0492</b> | <b>-0.358</b> |

|                                    |            |              |              |              |              |              |              |              |              |              |              |              |          |               |               |
|------------------------------------|------------|--------------|--------------|--------------|--------------|--------------|--------------|--------------|--------------|--------------|--------------|--------------|----------|---------------|---------------|
|                                    | <b>4.2</b> | <b>36.60</b> | <b>34.33</b> | <b>29.40</b> | <b>39.27</b> | <b>19.39</b> | <b>39.14</b> | <b>41.49</b> | <b>36.63</b> | <b>46.35</b> | <b>20.51</b> | <b>-1.94</b> | <b>1</b> | <b>0.0527</b> | <b>-0.353</b> |
|                                    | 4.4        | 36.71        | 34.44        | 29.51        | 39.38        | 19.37        | 39.14        | 41.49        | 36.63        | 46.35        | 20.51        | -1.91        | 1        | 0.0566        | -0.348        |
|                                    | 4.6        | 36.82        | 34.55        | 29.62        | 39.49        | 19.36        | 39.14        | 41.49        | 36.63        | 46.35        | 20.51        | -1.88        | 1        | 0.0606        | -0.342        |
|                                    | 4.8        | 36.93        | 34.67        | 29.73        | 39.60        | 19.34        | 39.14        | 41.49        | 36.63        | 46.34        | 20.51        | -1.85        | 1        | 0.0649        | -0.337        |
|                                    | 5.0        | 37.04        | 34.78        | 29.84        | 39.71        | 19.32        | 39.14        | 41.48        | 36.62        | 46.34        | 20.51        | -1.82        | 1        | 0.0694        | -0.331        |
|                                    | <b>6.0</b> | <b>37.59</b> | <b>35.33</b> | <b>30.40</b> | <b>40.27</b> | <b>19.25</b> | <b>39.14</b> | <b>41.48</b> | <b>36.62</b> | <b>46.34</b> | <b>20.51</b> | <b>-1.66</b> | <b>1</b> | <b>0.0962</b> | <b>-0.304</b> |
|                                    | <b>6.2</b> | <b>37.71</b> | <b>35.45</b> | <b>30.51</b> | <b>40.38</b> | <b>19.24</b> | <b>39.14</b> | <b>41.48</b> | <b>36.62</b> | <b>46.34</b> | <b>20.51</b> | <b>-1.63</b> | <b>1</b> | <b>0.1024</b> | <b>-0.299</b> |
|                                    | 7.0        | 38.15        | 35.89        | 30.95        | 40.83        | 19.19        | 39.14        | 41.48        | 36.61        | 46.34        | 20.51        | -1.51        | 1        | 0.1307        | -0.277        |
| <b>ISI</b>                         |            |              |              |              |              |              |              |              |              |              |              |              |          |               |               |
|                                    | 0          | 10.22        | 9.96         | 8.12         | 11.80        | 8.11         | 14.14        | 14.41        | 12.63        | 16.18        | 6.66         | -3.28        | 1        | 0.0010        | -0.588        |
|                                    | 2.0        | 11.32        | 11.09        | 9.27         | 12.91        | 7.96         | 14.14        | 14.39        | 12.63        | 16.14        | 6.66         | -2.46        | 1        | 0.0141        | -0.441        |
|                                    | <b>3.0</b> | <b>11.88</b> | <b>11.65</b> | <b>9.83</b>  | <b>13.47</b> | <b>7.93</b>  | <b>14.14</b> | <b>14.38</b> | <b>12.62</b> | <b>16.13</b> | <b>6.66</b>  | <b>-2.03</b> | <b>1</b> | <b>0.0424</b> | <b>-0.366</b> |
|                                    | <b>3.2</b> | <b>11.99</b> | <b>11.76</b> | <b>9.94</b>  | <b>13.58</b> | <b>7.93</b>  | <b>14.14</b> | <b>14.37</b> | <b>12.62</b> | <b>16.13</b> | <b>6.66</b>  | <b>-1.94</b> | <b>1</b> | <b>0.0519</b> | <b>-0.350</b> |
|                                    | <b>3.8</b> | <b>12.32</b> | <b>12.10</b> | <b>10.28</b> | <b>13.92</b> | <b>7.93</b>  | <b>14.14</b> | <b>14.37</b> | <b>12.61</b> | <b>16.13</b> | <b>6.66</b>  | <b>-1.69</b> | <b>1</b> | <b>0.0917</b> | <b>-0.304</b> |
|                                    | <b>4.0</b> | <b>12.43</b> | <b>12.21</b> | <b>10.39</b> | <b>14.04</b> | <b>7.93</b>  | <b>14.14</b> | <b>14.37</b> | <b>12.61</b> | <b>16.12</b> | <b>6.66</b>  | <b>-1.60</b> | <b>1</b> | <b>0.1095</b> | <b>-0.289</b> |
| <b>HAM-D</b>                       |            |              |              |              |              |              |              |              |              |              |              |              |          |               |               |
|                                    | 0          | 9.75         | 9.25         | 7.30         | 11.21        | 6.70         | 15.32        | 15.83        | 13.93        | 17.73        | 7.88         | -4.58        | 1        | < .0001       | -0.886        |
|                                    | 2.0        | 10.85        | 10.37        | 8.43         | 12.31        | 6.49         | 15.32        | 15.82        | 13.94        | 17.70        | 7.88         | -3.84        | 1        | 0.0001        | -0.745        |
|                                    | 4.0        | 11.96        | 11.48        | 9.54         | 13.42        | 6.43         | 15.32        | 15.81        | 13.94        | 17.69        | 7.88         | -3.05        | 1        | 0.0023        | -0.595        |
|                                    | 6.0        | 13.07        | 12.59        | 10.64        | 14.55        | 6.52         | 15.32        | 15.81        | 13.91        | 17.71        | 7.88         | -2.24        | 1        | 0.0250        | -0.438        |
|                                    | <b>6.6</b> | <b>13.40</b> | <b>12.93</b> | <b>10.96</b> | <b>14.89</b> | <b>6.58</b>  | <b>15.32</b> | <b>15.81</b> | <b>13.90</b> | <b>17.71</b> | <b>7.88</b>  | <b>-2.00</b> | <b>1</b> | <b>0.0456</b> | <b>-0.391</b> |
|                                    | <b>6.8</b> | <b>13.51</b> | <b>13.04</b> | <b>11.07</b> | <b>15.00</b> | <b>6.60</b>  | <b>15.32</b> | <b>15.81</b> | <b>13.90</b> | <b>17.71</b> | <b>7.88</b>  | <b>-1.92</b> | <b>1</b> | <b>0.0551</b> | <b>-0.375</b> |
|                                    | 7.0        | 13.62        | 13.15        | 11.18        | 15.12        | 6.63         | 15.32        | 15.81        | 13.89        | 17.72        | 7.88         | -1.84        | 1        | 0.0661        | -0.360        |
|                                    | <b>7.4</b> | <b>13.84</b> | <b>13.37</b> | <b>11.40</b> | <b>15.35</b> | <b>6.68</b>  | <b>15.32</b> | <b>15.80</b> | <b>13.89</b> | <b>17.72</b> | <b>7.88</b>  | <b>-1.68</b> | <b>1</b> | <b>0.0936</b> | <b>-0.328</b> |
|                                    | <b>7.6</b> | <b>13.95</b> | <b>13.48</b> | <b>11.50</b> | <b>15.46</b> | <b>6.71</b>  | <b>15.32</b> | <b>15.80</b> | <b>13.88</b> | <b>17.73</b> | <b>7.88</b>  | <b>-1.60</b> | <b>1</b> | <b>0.1104</b> | <b>-0.313</b> |
|                                    | 7.8        | 14.06        | 13.59        | 11.61        | 15.58        | 6.74         | 15.32        | 15.80        | 13.88        | 17.73        | 7.88         | -1.52        | 1        | 0.1294        | -0.297        |
|                                    | 8.0        | 14.18        | 13.71        | 11.72        | 15.69        | 6.77         | 15.32        | 15.80        | 13.87        | 17.73        | 7.88         | 1.44         | 1        | 0.1509        | 0.281         |
| <b>HAM-D (without sleep items)</b> |            |              |              |              |              |              |              |              |              |              |              |              |          |               |               |
|                                    | 0          | 6.69         | 6.19         | 4.50         | 7.89         | 5.87         | 11.46        | 11.97        | 10.27        | 13.68        | 6.87         | -4.47        | 1        | < .0001       | -0.891        |
|                                    | 4.0        | 8.91         | 8.42         | 6.74         | 10.10        | 5.58         | 11.46        | 11.96        | 10.27        | 13.65        | 6.87         | -2.76        | 1        | 0.0058        | -0.557        |

|            |              |             |             |              |             |              |              |              |              |             |              |          |               |               |
|------------|--------------|-------------|-------------|--------------|-------------|--------------|--------------|--------------|--------------|-------------|--------------|----------|---------------|---------------|
| 5.0        | 9.46         | 8.98        | 7.29        | 10.66        | 5.62        | 11.46        | 11.96        | 10.26        | 13.66        | 6.87        | -2.31        | 1        | 0.0207        | -0.468        |
| <b>5.6</b> | <b>9.79</b>  | <b>9.31</b> | <b>7.62</b> | <b>11.00</b> | <b>5.67</b> | <b>11.46</b> | <b>11.95</b> | <b>10.25</b> | <b>13.66</b> | <b>6.87</b> | <b>-2.04</b> | <b>1</b> | <b>0.0409</b> | <b>-0.414</b> |
| <b>5.8</b> | <b>9.90</b>  | <b>9.42</b> | <b>7.73</b> | <b>11.12</b> | <b>5.69</b> | <b>11.46</b> | <b>11.95</b> | <b>10.24</b> | <b>13.66</b> | <b>6.87</b> | <b>-1.96</b> | <b>1</b> | <b>0.0506</b> | <b>-0.395</b> |
| 6.0        | 10.01        | 9.53        | 7.84        | 11.23        | 5.71        | 11.46        | 11.95        | 10.24        | 13.67        | 6.87        | -1.87        | 1        | 0.0622        | -0.377        |
| <b>6.4</b> | <b>10.23</b> | <b>9.76</b> | <b>8.05</b> | <b>11.46</b> | <b>5.75</b> | <b>11.46</b> | <b>11.95</b> | <b>10.23</b> | <b>13.67</b> | <b>6.87</b> | <b>-1.69</b> | <b>1</b> | <b>0.0918</b> | <b>-0.341</b> |
| <b>6.6</b> | <b>10.35</b> | <b>9.87</b> | <b>8.16</b> | <b>11.58</b> | <b>5.78</b> | <b>11.46</b> | <b>11.95</b> | <b>10.23</b> | <b>13.67</b> | <b>6.87</b> | <b>-1.60</b> | <b>1</b> | <b>0.1103</b> | <b>-0.323</b> |
| 6.8        | 10.46        | 9.98        | 8.27        | 11.69        | 5.80        | 11.46        | 11.95        | 10.22        | 13.68        | 6.87        | -1.51        | 1        | 0.1317        | -0.305        |
| 7.0        | 10.57        | 10.09       | 8.38        | 11.81        | 5.83        | 11.46        | 11.95        | 10.22        | 13.68        | 6.87        | -1.42        | 1        | 0.1560        | -0.287        |

Note: M = mean; M\* = marginal means; CI = confidence interval; SD = standard deviation; ES = Effect Size based on marginal means; CAPS = Clinician Administered PTSD Scale; HAM-D = Hamilton Depression Rating Scale; ISI = Insomnia Severity Index
